# Supplementary material for: Distinct Stromal Cell Factor Combinations Can Separately Control Hematopoietic Stem Cell Survival, Proliferation, and Self-Renewal
Source: PubMed Central journal article supplement (PMC4074342; doi:10.1016/j.celrep.2014.05.014), 2014-06-06
Supplement: mmc1.pdf [file mmc1.pdf]

## SUPPLEMENTAL MATERIAL

### Supplemental Methods - HSC transplantation assays

Cells were transplanted by tail vein injection into sublethally irradiated Ly5-congenic *W41* mice and PB follow-up analyses of donor contributions to the B, T and GM lineages were then performed 8, 16, and 24 weeks later as previously described (Kent et al., 2007) using both anti-CD45.1-APC (eBiosciences) and anti-CD45.2-FITC (BD) to enable donor and recipient cells to be distinguished and to ensure that any double positive CD45.1 and CD45.2 events were excluded. Staining with anti-Ly6g-PE and anti-Mac1-PE was used to detect GM cells, anti-CD19-PE for B-cells, and anti-CD5-PE for T-cells (all antibodies from BD). Secondary transplantations were performed 24 weeks after the primary transplantations. The subtype of the original HSC(s) transplanted was first determined 16 weeks post transplantation and reconfirmed either within one week before or on the day cells were harvested to perform secondary transplantations. For the latter, BM cells were harvested from both femurs, tibiae and the pelvis of primary mice, red blood cells lysed, and  $10^7$  cells then injected into each secondary recipient. HSC frequency values were calculated from limiting dilution transplant results using an on-line program (<http://bioinf.wehi.edu.au/software/elda/>) and a positive read-out of >1% contribution to the total PB white blood cell pool at 16 weeks. HSCs were subclassified as DSR-HSCs when they produced >1% of the PB GM cells and as LSR-HSCs when they contributed <1% of the GM cells 16 weeks after transplantation. Differentiation patterns of HSCs were subclassified as  $\alpha$ ,  $\beta$ ,  $\gamma$ , and  $\delta$  based on the following ratios of their contributions to the total PB GM vs (T+B)-cell pools in recipient mice assessed 16-24 weeks post-transplant (i.e., >2.0; 0.25-2.0, <0.25 with >1% contribution to the myeloid lineage, and <0.25 with <1% contribution to the myeloid lineage, respectively), as described previously (Dykstra et al., 2007).

## Microarray Analysis

All arrays were robust multi-array averaged (RMA) normalized using the Bioconductor package 'xps' in R (<http://www.R-project.org/>) including the metacore probesets grouped by exon (Gentleman et al., 2004). Gene annotation data was added using a combination of the NetAffx (Release 31) annotation files as well as the Bioconductor packages 'mogene10sttranscriptcluster.db' and 'Org.Mm.eg.db'. All probe sets that were not mapped to an Entrez Gene identifier were discarded. Data Above Background (DAB) scores were calculated for each probe set and those probe sets with a DAB p-value  $\leq 0.05$  in both technical replicates of at least one condition were retained. In the case of multiple probe sets mapping to the same Entrez Gene identifier, the probe set with the highest maximum absolute deviation across all chips was retained. This was done in order to maximize power in later statistical tests as it reduces multiple testing while retaining the probes with the greatest signal. Expression values were then normalized between the arrays by quantile normalization (Smyth et al., 2005) using the R package 'limma'.

Publicly available microarray data for the UG26-1B6 cell line (Gene Expression Omnibus, GSE11589) was used together with the data for the freshly isolated ESLAM cells (from above) in order to generate a list of potential secreted factors. This data (from the mouse 4302 chip) was RMA-normalized and transcripts called as present if at least one probe set had a MAS5 p-value of 0.05 or less using the R package 'affy'. Transcripts that were defined as present and that also had the gene ontology (GO) term "extracellular region" (GO:0005576) were compared to transcripts with the gene ontology term "receptor activity" (GO:0004872) present in transcripts of fresh ESLAM cells (as defined above). "Extracellular region" transcripts from UG26 which had transcripts with "receptor activity" in fresh ESLAM cells predicted or

shown to interact in either the National Institute of Aging (NIA) mouse protein-protein interaction database (Yellaboina et al., 2008), the BioGRID database (Stark et al., 2006) or the Cytokine-cytokine receptor interaction (mmu04060) or ECM-receptor interaction (mmu04512) entries from the Kyoto Encyclopedia of Genes and Genomes (KEGG) Pathway database ([www.genome.jp/kegg/pathway.html](http://www.genome.jp/kegg/pathway.html)) were retained as potential secreted factors, and their median expression and putative receptors (interacting “receptor activity” transcripts) recorded.

For pathway analysis, arrays from extracts of cells exposed to CM were grouped and compared against extracts from fresh ESLAM cells and from cells exposed to SF+IL-11 only in order to provide biological replication and minimize differences due only to differential cell cycle status. The 'romer' algorithm (a rotation based modification of the GSEA algorithm (Subramanian et al., 2005)) was used to test for differential expression of genes in pathways from the REACTOME database (Croft et al.) (taken from the R version of the molecular signatures database, <http://bioinf.wehi.edu.au/software/MSigDB/>) using a mixed alternative hypothesis (i.e., the differential expression can be in both directions) with the “floor mean” test statistic and 100,000 rotations, correcting for correlation between technical replicates (Smyth et al., 2005).

### **Supplemental Figure**

**Figure S1. Comparison of the serial GM-, B-, and T-cell reconstituting activities of the 2  $\beta$ -HSCs and their progeny produced from the first *in vitro* division of a single ESLAM cell.**

Donor-derived contributions to the PB GM cells are shown in red, to the PB B-cells in blue, and to the PB T-cells in black.

Supplementary Figure 1

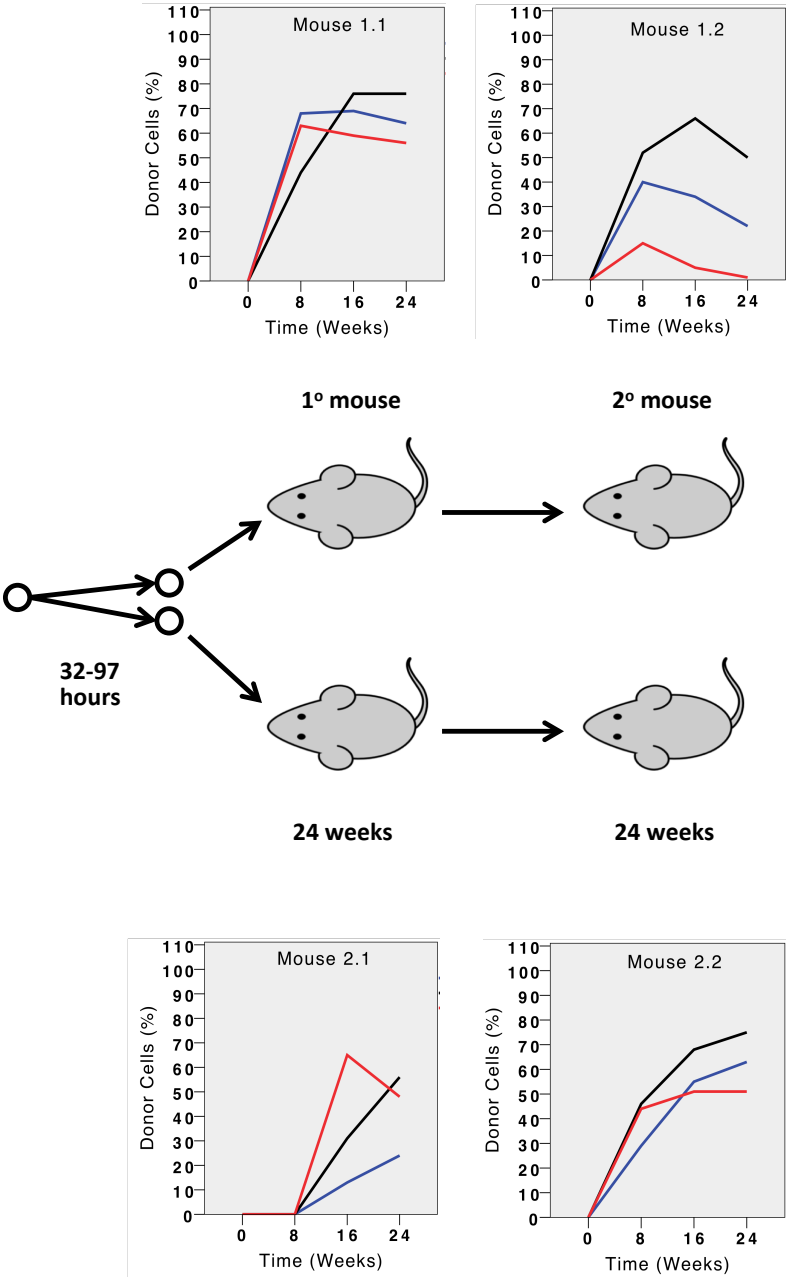

## Supplemental Tables

**Table S1: REACTOME pathways (n=250) with significantly altered transcript expression in ESLAM cells maintained in S+11+UG26 CM.**

| Pathway                                                           | Gene No. | P value    |
|-------------------------------------------------------------------|----------|------------|
| ADP SIGNALLING THROUGH P2Y PURINOCEPTOR 1                         | 25       | 9.9999E-06 |
| APOPTOSIS                                                         | 122      | 9.9999E-06 |
| AUTODEGRADATION OF CDH1 BY CDH1 APC                               | 53       | 9.9999E-06 |
| AXON GUIDANCE                                                     | 156      | 9.9999E-06 |
| BRANCHED CHAIN AMINO ACID CATABOLISM                              | 17       | 9.9999E-06 |
| CD28 DEPENDENT VAV1 PATHWAY                                       | 11       | 9.9999E-06 |
| CDC20 PHOSPHO APC MEDIATED DEGRADATION OF CYCLIN A                | 59       | 9.9999E-06 |
| CDT1 ASSOCIATION WITH THE CDC6 ORC ORIGIN COMPLEX                 | 48       | 9.9999E-06 |
| CELL CYCLE CHECKPOINTS                                            | 104      | 9.9999E-06 |
| CELL CYCLE MITOTIC                                                | 292      | 9.9999E-06 |
| CELL SURFACE INTERACTIONS AT THE VASCULAR WALL                    | 89       | 9.9999E-06 |
| CENTROSOME MATURATION                                             | 67       | 9.9999E-06 |
| CITRIC ACID CYCLE                                                 | 18       | 9.9999E-06 |
| CLATHRIN DERIVED VESICLE BUDDING                                  | 56       | 9.9999E-06 |
| COSTIMULATION BY THE CD28 FAMILY                                  | 60       | 9.9999E-06 |
| CYCLIN E ASSOCIATED EVENTS DURING G1 S TRANSITION                 | 54       | 9.9999E-06 |
| DARPP32 EVENTS                                                    | 25       | 9.9999E-06 |
| DIABETES PATHWAYS                                                 | 292      | 9.9999E-06 |
| DNA REPAIR                                                        | 98       | 9.9999E-06 |
| DNA REPLICATION PRE INITIATION                                    | 71       | 9.9999E-06 |
| DOUBLE STRAND BREAK REPAIR                                        | 21       | 9.9999E-06 |
| DOWN STREAM SIGNAL TRANSDUCTION                                   | 35       | 9.9999E-06 |
| DOWNSTREAM TCR SIGNALING                                          | 36       | 9.9999E-06 |
| ELECTRON TRANSPORT CHAIN                                          | 56       | 9.9999E-06 |
| ELONGATION AND PROCESSING OF CAPPED TRANSCRIPTS                   | 109      | 9.9999E-06 |
| FORMATION AND MATURATION OF MRNA TRANSCRIPT                       | 127      | 9.9999E-06 |
| FORMATION OF A POOL OF FREE 40S SUBUNITS                          | 40       | 9.9999E-06 |
| FORMATION OF ATP BY CHEMIOSMOTIC COUPLING                         | 10       | 9.9999E-06 |
| FORMATION OF PLATELET PLUG                                        | 180      | 9.9999E-06 |
| FORMATION OF THE TERNARY COMPLEX AND SUBSEQUENTLY THE 43S COMPLEX | 27       | 9.9999E-06 |
| FURTHER PLATELET RELEASATE                                        | 22       | 9.9999E-06 |
| G1 S TRANSITION                                                   | 95       | 9.9999E-06 |
| G2 M TRANSITION                                                   | 79       | 9.9999E-06 |
| GENE EXPRESSION                                                   | 341      | 9.9999E-06 |
| GENERIC TRANSCRIPTION PATHWAY                                     | 35       | 9.9999E-06 |
| GLOBAL GENOMIC NER                                                | 32       | 9.9999E-06 |
| GLUCONEOGENESIS                                                   | 27       | 9.9999E-06 |
| GLUCOSE METABOLISM                                                | 51       | 9.9999E-06 |
| GLUCOSE REGULATION OF INSULIN SECRETION                           | 130      | 9.9999E-06 |

|                                                              |     |            |
|--------------------------------------------------------------|-----|------------|
| GLYCOGEN BREAKDOWN GLYCOGENOLYSIS                            | 15  | 9.9999E-06 |
| GLYCOLYSIS                                                   | 19  | 9.9999E-06 |
| GOLGI ASSOCIATED VESICLE BIOGENESIS                          | 50  | 9.9999E-06 |
| GRB2 SOS PROVIDES LINKAGE TO MAPK SIGNALING FOR INTERGRINS   | 15  | 9.9999E-06 |
| GTP HYDROLYSIS AND JOINING OF THE 60S RIBOSOMAL SUBUNIT      | 50  | 9.9999E-06 |
| HEMOSTASIS                                                   | 264 | 9.9999E-06 |
| HIV INFECTION                                                | 169 | 9.9999E-06 |
| HIV LIFE CYCLE                                               | 98  | 9.9999E-06 |
| HIV1 TRANSCRIPTION INITIATION                                | 38  | 9.9999E-06 |
| HOST INTERACTIONS OF HIV FACTORS                             | 109 | 9.9999E-06 |
| INFLUENZA LIFE CYCLE                                         | 80  | 9.9999E-06 |
| INFLUENZA VIRAL RNA TRANSCRIPTION AND REPLICATION            | 44  | 9.9999E-06 |
| INSULIN SYNTHESIS AND SECRETION                              | 72  | 9.9999E-06 |
| INTEGRATION OF ENERGY METABOLISM                             | 198 | 9.9999E-06 |
| INTEGRIN CELL SURFACE INTERACTIONS                           | 80  | 9.9999E-06 |
| LATE PHASE OF HIV LIFE CYCLE                                 | 87  | 9.9999E-06 |
| LOSS OF NLP FROM MITOTIC CENTROSOMES                         | 60  | 9.9999E-06 |
| M G1 TRANSITION                                              | 57  | 9.9999E-06 |
| MEMBRANE TRAFFICKING                                         | 73  | 9.9999E-06 |
| METABLISM OF NUCLEOTIDES                                     | 70  | 9.9999E-06 |
| METABOLISM OF CARBOHYDRATES                                  | 109 | 9.9999E-06 |
| METABOLISM OF PROTEINS                                       | 153 | 9.9999E-06 |
| MITOTIC PROMETAPHASE                                         | 89  | 9.9999E-06 |
| MRNA 3 END PROCESSING                                        | 22  | 9.9999E-06 |
| MRNA PROCESSING                                              | 31  | 9.9999E-06 |
| MRNA SPLICING                                                | 83  | 9.9999E-06 |
| MRNA SPLICING MINOR PATHWAY                                  | 32  | 9.9999E-06 |
| NCAM SIGNALING FOR NEURITE OUT GROWTH                        | 67  | 9.9999E-06 |
| NCAM1 INTERACTIONS                                           | 43  | 9.9999E-06 |
| NUCLEAR IMPORT OF REV PROTEIN                                | 29  | 9.9999E-06 |
| NUCLEOTIDE EXCISION REPAIR                                   | 47  | 9.9999E-06 |
| OPIOID SIGNALLING                                            | 82  | 9.9999E-06 |
| ORC1 REMOVAL FROM CHROMATIN                                  | 59  | 9.9999E-06 |
| OTHER SEMAPHORIN INTERACTIONS                                | 15  | 9.9999E-06 |
| P38MAPK EVENTS                                               | 13  | 9.9999E-06 |
| P53 INDEPENDENT DNA DAMAGE RESPONSE                          | 39  | 9.9999E-06 |
| PEPTIDE CHAIN ELONGATION                                     | 31  | 9.9999E-06 |
| PLATELET ACTIVATION                                          | 161 | 9.9999E-06 |
| PLATELET ACTIVATION TRIGGERS                                 | 58  | 9.9999E-06 |
| PLATELET DEGRANULATION                                       | 82  | 9.9999E-06 |
| PREFOLDIN MEDIATED TRANSFER OF SUBSTRATE TO CCT TRIC         | 24  | 9.9999E-06 |
| PROCESSING OF CAPPED INTRON CONTAINING PRE MRNA              | 113 | 9.9999E-06 |
| PYRUVATE METABOLISM AND TCA CYCLE                            | 35  | 9.9999E-06 |
| REGULATION OF APC ACTIVATORS BETWEEN G1 S AND EARLY ANAPHASE | 66  | 9.9999E-06 |
| REGULATION OF BETA CELL DEVELOPMENT                          | 62  | 9.9999E-06 |
| REGULATION OF GENE EXPRESSION IN BETA CELLS                  | 48  | 9.9999E-06 |
| REGULATION OF INSULIN SECRETION                              | 180 | 9.9999E-06 |
| REGULATION OF INSULIN SECRETION BY GLUCAGON LIKE PEPTIDE 1   | 59  | 9.9999E-06 |
| REGULATION OF ORNITHINE DECARBOXYLASE                        | 43  | 9.9999E-06 |
| REV MEDIATED NUCLEAR EXPORT OF HIV1 RNA                      | 30  | 9.9999E-06 |

|                                                                           |     |            |
|---------------------------------------------------------------------------|-----|------------|
| RHO GTPASE CYCLE                                                          | 120 | 9.9999E-06 |
| RNA POL II CTD PHOSPHORYLATION AND INTERACTION WITH CE                    | 25  | 9.9999E-06 |
| RNA POLYMERASE I CHAIN ELONGATION                                         | 20  | 9.9999E-06 |
| RNA POLYMERASE I PROMOTER ESCAPE                                          | 20  | 9.9999E-06 |
| RNA POLYMERASE I TRANSCRIPTION INITIATION                                 | 24  | 9.9999E-06 |
| RNA POLYMERASE I TRANSCRIPTION TERMINATION                                | 21  | 9.9999E-06 |
| RNA POLYMERASE II TRANSCRIPTION                                           | 78  | 9.9999E-06 |
| S PHASE                                                                   | 98  | 9.9999E-06 |
| SCF BETA TRCP MEDIATED DEGRADATION OF EMI1                                | 44  | 9.9999E-06 |
| SCF SKP2 MEDIATED DEGRADATION OF P27 P21                                  | 48  | 9.9999E-06 |
| SEMA3A PAK DEPENDENT AXON REPULSION                                       | 13  | 9.9999E-06 |
| SEMA4D IN SEMAPHORIN SIGNALING                                            | 28  | 9.9999E-06 |
| SEMA4D INDUCED CELL MIGRATION AND GROWTH CONE COLLAPSE                    | 23  | 9.9999E-06 |
| SEMAPHORIN INTERACTIONS                                                   | 63  | 9.9999E-06 |
| SHC MEDIATED SIGNALLING                                                   | 12  | 9.9999E-06 |
| SIGNALING BY PDGF                                                         | 63  | 9.9999E-06 |
| SIGNALING BY TGF BETA                                                     | 15  | 9.9999E-06 |
| SIGNALING BY WNT                                                          | 54  | 9.9999E-06 |
| SIGNALING IN IMMUNE SYSTEM                                                | 294 | 9.9999E-06 |
| SIGNALLING BY NGF                                                         | 208 | 9.9999E-06 |
| SIGNALLING TO ERKS                                                        | 34  | 9.9999E-06 |
| SIGNALLING TO RAS                                                         | 26  | 9.9999E-06 |
| SNRNP ASSEMBLY                                                            | 45  | 9.9999E-06 |
| SOS MEDIATED SIGNALLING                                                   | 13  | 9.9999E-06 |
| SYNTHESIS OF DNA                                                          | 84  | 9.9999E-06 |
| TCR SIGNALING                                                             | 53  | 9.9999E-06 |
| TIE2 SIGNALING                                                            | 18  | 9.9999E-06 |
| TRAF6 MEDIATED INDUCTION OF THE ANTIVIRAL CYTOKINE IFN ALPHA BETA CASCADE | 52  | 9.9999E-06 |
| TRANSCRIPTION                                                             | 146 | 9.9999E-06 |
| TRANSCRIPTION OF THE HIV GENOME                                           | 57  | 9.9999E-06 |
| TRANSLATION                                                               | 64  | 9.9999E-06 |
| TRANSLATION INITIATION COMPLEX FORMATION                                  | 33  | 9.9999E-06 |
| TRANSMISSION ACROSS CHEMICAL SYNAPSES                                     | 127 | 9.9999E-06 |
| TRANSPORT OF MATURE MRNA DERIVED FROM AN INTRON CONTAINING TRANSCRIPT     | 39  | 9.9999E-06 |
| TRKA SIGNALLING FROM THE PLASMA MEMBRANE                                  | 102 | 9.9999E-06 |
| VIF MEDIATED DEGRADATION OF APOBEC3G                                      | 42  | 9.9999E-06 |
| VIRAL MRNA TRANSLATION                                                    | 30  | 9.9999E-06 |
| VPR MEDIATED NUCLEAR IMPORT OF PICS                                       | 30  | 9.9999E-06 |
| PP2A MEDIATED DEPHOSPHORYLATION OF KEY METABOLIC FACTORS                  | 10  | 9.9999E-06 |
| SYNTHESIS AND INTERCONVERSION OF NUCLEOTIDE DI AND TRIPHOSPHATES          | 18  | 9.9999E-06 |
| TRANSPORT OF RIBONUCLEOPROTEINS INTO THE HOST NUCLEUS                     | 28  | 9.9999E-06 |
| GLUCOSE TRANSPORT                                                         | 37  | 9.9999E-06 |
| MRNA DECAY BY 5 TO 3 EXORIBONUCLEASE                                      | 12  | 9.9999E-06 |
| REGULATION OF GLUCOKINASE BY GLUCOKINASE REGULATORY PROTEIN               | 28  | 9.9999E-06 |
| STABILIZATION OF P53                                                      | 41  | 9.9999E-06 |
| DEPOLARIZATION OF THE PRESYNAPTIC TERMINAL TRIGGERS THE                   | 12  | 9.9999E-06 |

|                                                                                         |     |             |
|-----------------------------------------------------------------------------------------|-----|-------------|
| OPENING OF CALCIUM CHANNELS                                                             |     |             |
| INHIBITION OF INSULIN SECRETION BY ADRENALINE<br>NORADRENALINE                          | 30  | 9.9999E-06  |
| MRNA DECAY BY 3 TO 5 EXORIBONUCLEASE                                                    | 10  | 9.9999E-06  |
| NEP NS2 INTERACTS WITH THE CELLULAR EXPORT MACHINERY                                    | 28  | 9.9999E-06  |
| RNA POLYMERASE I III AND MITOCHONDRIAL TRANSCRIPTION                                    | 82  | 9.9999E-06  |
| TRANSPORT OF THE SLBP INDEPENDENT MATURE MRNA                                           | 31  | 9.9999E-06  |
| SMOOTH MUSCLE CONTRACTION                                                               | 23  | 9.9999E-06  |
| METABOLISM OF MRNA                                                                      | 42  | 9.9999E-06  |
| METABOLISM OF RNA                                                                       | 87  | 9.9999E-06  |
| MITOTIC M M G1 PHASES                                                                   | 150 | 9.9999E-06  |
| APCDC20 MEDIATED DEGRADATION OF CYCLIN B                                                | 16  | 1.99998E-05 |
| CHAPERONIN MEDIATED PROTEIN FOLDING                                                     | 45  | 1.99998E-05 |
| FORMATION OF TUBULIN FOLDING INTERMEDIATES BY CCT TRIC                                  | 17  | 1.99998E-05 |
| INACTIVATION OF APC VIA DIRECT INHIBITION OF THE APCOMPLEX                              | 18  | 1.99998E-05 |
| GRB2 EVENTS IN EGFR SIGNALING                                                           | 13  | 2.99997E-05 |
| HIV1 TRANSCRIPTION ELONGATION                                                           | 39  | 2.99997E-05 |
| P75 NTR RECEPTOR MEDIATED SIGNALLING                                                    | 78  | 2.99997E-05 |
| RNA POLYMERASE I PROMOTER CLEARANCE                                                     | 49  | 2.99997E-05 |
| SEMA3A PLEXIN REPULSION SIGNALING BY INHIBITING INTEGRIN<br>ADHESION                    | 13  | 2.99997E-05 |
| DUAL INCISION REACTION IN GG NER                                                        | 20  | 3.99996E-05 |
| SIGNAL AMPLIFICATION                                                                    | 31  | 5.99994E-05 |
| LYSOSOME VESICLE BIOGENESIS                                                             | 22  | 6.99993E-05 |
| MTOR SIGNALLING                                                                         | 26  | 6.99993E-05 |
| MUSCLE CONTRACTION                                                                      | 50  | 8.99991E-05 |
| MAP KINASES ACTIVATION IN TLR CASCADE                                                   | 44  | 0.000109999 |
| METABOLISM OF AMINO ACIDS                                                               | 152 | 0.000119999 |
| TRANSCRIPTION COUPLED NER                                                               | 42  | 0.000129999 |
| PHOSPHORYLATION OF THE APC                                                              | 16  | 0.000149999 |
| DUAL INCISION REACTION IN TC NER                                                        | 27  | 0.000159998 |
| RNA POLYMERASE III TRANSCRIPTION TERMINATION                                            | 16  | 0.000159998 |
| TOLL RECEPTOR CASCADES                                                                  | 83  | 0.000209998 |
| G ALPHA 12 13 SIGNALLING EVENTS                                                         | 54  | 0.000259997 |
| HORMONE BIOSYNTHESIS                                                                    | 48  | 0.000289997 |
| TOLL LIKE RECEPTOR 3 CASCADE                                                            | 58  | 0.000339997 |
| EXTENSION OF TELOMERES                                                                  | 26  | 0.000369996 |
| CONVERSION FROM APC CDC20 TO APC CDH1 IN LATE ANAPHASE                                  | 17  | 0.000419996 |
| CYCLIN A1 ASSOCIATED EVENTS DURING G2 M TRANSITION                                      | 14  | 0.000419996 |
| MYOGENESSIS                                                                             | 28  | 0.000419996 |
| CRMP5 IN SEMA3A SIGNALING                                                               | 15  | 0.000689993 |
| ENERGY DEPENDENT REGULATION OF MTOR BY LKB1 AMPK                                        | 17  | 0.000689993 |
| PURINE RIBONUCLEOSIDE MONOPHOSPHATE BIOSYNTHESIS                                        | 11  | 0.000729993 |
| REGULATION OF AMPK ACTIVITY VIA LKB1                                                    | 14  | 0.000949991 |
| SIGNALING TO P38 VIA RIT AND RIN                                                        | 14  | 0.00099999  |
| SHC RELATED EVENTS                                                                      | 14  | 0.00104999  |
| ACTIVATION OF ATR IN RESPONSE TO REPLICATION STRESS                                     | 37  | 0.001199988 |
| NEURORANSITTER RECEPTOR BINDING AND DOWNSTREAM<br>TRANSMISSION IN THE POSTSYNAPTIC CELL | 81  | 0.001329987 |
| P130CAS LINKAGE TO MAPK SIGNALING FOR INTEGRINS                                         | 15  | 0.001429986 |
| IRS RELATED EVENTS                                                                      | 78  | 0.001439986 |



|                                                                                    |     |             |
|------------------------------------------------------------------------------------|-----|-------------|
| COLLAGEN MEDIATED ACTIVATION CASCADE                                               | 22  | 0.001879981 |
| PD1 SIGNALING                                                                      | 19  | 0.002419976 |
| DNA STRAND ELONGATION                                                              | 30  | 0.002529975 |
| ACTIVATION OF NMDA RECEPTOR UPON GLUTAMATE BINDING AND POSTSYNAPTIC EVENTS         | 35  | 0.002779972 |
| POST NMDA RECEPTOR ACTIVATION EVENTS                                               | 31  | 0.00297997  |
| ACTIVATION OF KAINATE RECEPTORS UPON GLUTAMATE BINDING                             | 32  | 0.003079969 |
| UNFOLDED PROTEIN RESPONSE                                                          | 18  | 0.003359966 |
| COPI MEDIATED TRANSPORT                                                            | 10  | 0.003579964 |
| IONOTROPIC ACTIVITY OF KAINATE RECEPTORS                                           | 12  | 0.003679963 |
| G BETA GAMMA SIGNALLING THROUGH PI3KGAMMA                                          | 25  | 0.004239958 |
| ASSOCIATION OF TRIC CCT WITH TARGET PROTEINS DURING BIOSYNTHESIS                   | 29  | 0.004539955 |
| FRS2 MEDIATED ACTIVATION                                                           | 16  | 0.004679953 |
| SIGNALING BY EGFR                                                                  | 46  | 0.004809952 |
| MAPK TARGETS NUCLEAR EVENTS MEDIATED BY MAP KINASES                                | 30  | 0.005239948 |
| FANCONI ANEMIA PATHWAY                                                             | 14  | 0.005269947 |
| NOREPINEPHRINE NEUROTRANSMITTER RELEASE CYCLE                                      | 12  | 0.005859941 |
| UNWINDING OF DNA                                                                   | 11  | 0.006569934 |
| G PROTEIN ACTIVATION                                                               | 28  | 0.007599924 |
| HOMOLOGOUS RECOMBINATION REPAIR                                                    | 15  | 0.007729923 |
| POST CHAPERONIN TUBULIN FOLDING PATHWAY                                            | 14  | 0.007929921 |
| INNATE IMMUNITY SIGNALING                                                          | 102 | 0.008489915 |
| FORMATION OF THE EARLY ELONGATION COMPLEX                                          | 30  | 0.008569914 |
| ERKS ARE INACTIVATED                                                               | 12  | 0.008609914 |
| G PROTEIN BETA GAMMA SIGNALLING                                                    | 28  | 0.00895991  |
| THROMBOXANE SIGNALLING THROUGH TP RECEPTOR                                         | 23  | 0.009259907 |
| CYTOSOLIC TRNA AMINOACYLATION                                                      | 23  | 0.009319907 |
| THROMBIN SIGNALLING THROUGH PROTEINASE ACTIVATED RECEPTORS                         | 27  | 0.009469905 |
| ACTIVATION OF THE PRE REPLICATIVE COMPLEX                                          | 29  | 0.009619904 |
| SIGNALING BY VEGF                                                                  | 11  | 0.009619904 |
| INTEGRIN ALPHAIIIBETA3 SIGNALING                                                   | 23  | 0.009699903 |
| CAM PATHWAY                                                                        | 25  | 0.009899901 |
| POST TRANSLATIONAL PROTEIN MODIFICATION                                            | 39  | 0.009939901 |
| CELL DEATH SIGNALLING VIA NRAGE NRIF AND NADE                                      | 58  | 0.0100299   |
| NOTCH HLH TRANSCRIPTION PATHWAY                                                    | 13  | 0.010729893 |
| PLC BETA MEDIATED EVENTS                                                           | 37  | 0.011629884 |
| G1 PHASE                                                                           | 16  | 0.012059879 |
| ACTIVATION OF THE AP1 FAMILY OF TRANSCRIPTION FACTORS                              | 10  | 0.012179878 |
| NUCLEAR EVENTS KINASE AND TRANSCRIPTION FACTOR ACTIVATION                          | 24  | 0.014819852 |
| CD28 CO STIMULATION                                                                | 29  | 0.01495985  |
| RECRUITMENT OF NUMA TO MITOTIC CENTROSOMES                                         | 9   | 0.015909841 |
| INTRINSIC PATHWAY FOR APOPTOSIS                                                    | 28  | 0.016219838 |
| EARLY PHASE OF HIV LIFE CYCLE                                                      | 11  | 0.016759832 |
| REGULATION OF LIPID METABOLISM BY PEROXISOME PROLIFERATOR ACTIVATED RECEPTOR ALPHA | 59  | 0.017239828 |
| METABOLISM OF NITRIC OXIDE                                                         | 12  | 0.017549825 |
| ACTIVATED AMPK STIMULATES FATTY ACID OXIDATION IN MUSCLE                           | 17  | 0.018879811 |
| STEROID HORMONE BIOSYNTHESIS                                                       | 12  | 0.020779792 |

|                                                                  |    |             |
|------------------------------------------------------------------|----|-------------|
| GLUCAGON TYPE LIGAND RECEPTORS                                   | 33 | 0.020829792 |
| G2 M CHECKPOINTS                                                 | 42 | 0.021099789 |
| PURINE METABOLISM                                                | 30 | 0.023589764 |
| RNA POLYMERASE III TRANSCRIPTION                                 | 32 | 0.024209758 |
| PLC GAMMA1 SIGNALLING                                            | 34 | 0.024369756 |
| RNA POLYMERASE III TRANSCRIPTION INITIATION FROM TYPE 3 PROMOTER | 21 | 0.025379746 |
| EGFR DOWNREGULATION                                              | 22 | 0.026479735 |
| NRAGE SIGNALS DEATH THROUGH JNK                                  | 47 | 0.026749733 |
| ERK MAPK TARGETS                                                 | 21 | 0.02903971  |
| TAT MEDIATED HIV1 ELONGATION ARREST AND RECOVERY                 | 28 | 0.030679693 |
| ADP SIGNALLING THROUGH P2Y PURINOCEPTOR 12                       | 21 | 0.030729693 |
| STEROID HORMONES                                                 | 19 | 0.030919691 |
| PI3K AKT SIGNALLING                                              | 37 | 0.031249688 |
| G BETA GAMMA SIGNALLING THROUGH PLC BETA                         | 20 | 0.031289687 |
| CTLA4 INHIBITORY SIGNALING                                       | 21 | 0.035129649 |
| ACTIVATION OF RAC                                                | 14 | 0.035659643 |
| RAS ACTIVATION UOPN CA2+ INFUX THROUGH NMDA RECEPTOR             | 17 | 0.036129639 |
| ACTIVATION OF CHAPERONES BY IRE1 ALPHA                           | 9  | 0.042199578 |
| POLYMERASE SWITCHING                                             | 13 | 0.042259577 |
| MTORC1 MEDIATED SIGNALLING                                       | 10 | 0.044689553 |
| CD28 DEPENDENT PI3K AKT SIGNALING                                | 19 | 0.046469535 |
| RNA POLYMERASE III CHAIN ELONGATION                              | 11 | 0.047679523 |

**Table S2. Significantly affected pathways of ESLAM cells upon stimulation with UG26 CM and SF+IL-11.**

| <b>Signaling pathways</b> | <b>Number of involved genes</b> | <b>Regulation of HSC</b>      | <b>References</b>                           |
|---------------------------|---------------------------------|-------------------------------|---------------------------------------------|
| NGF                       | 208                             | AGM HSC activity              | (Durand et al., 2007)                       |
| PDGF                      | 63                              | HSC expansion                 | (Su et al., 2002)                           |
| WNT                       | 54                              | HSC proliferation             | (Reya et al., 2003; Willert et al., 2003)   |
| EGFR                      | 46                              | HSC migration                 | (Ryan et al.)                               |
| ROBO Receptor             | 32                              | HSC-niche interaction         | (Shibata et al., 2009; Smith-Berdan et al.) |
| BMP                       | 23                              | AGM HSC activity              | (Durand et al., 2007)                       |
| Integrin Signaling        | 23                              | HSC adhesion                  | (Benveniste et al., 2010; Notta et al.)     |
| TGF- $\beta$              | 15                              | HSC subtype regulation        | (Challen et al.)                            |
| Notch                     | 14                              | HSC <i>de novo</i> generation | (Kumano et al., 2003)                       |
| VEGF                      | 11                              | HSC survival                  | (Gerber et al., 2002)                       |

NGF: nerve growth factor, AGM: aorta-gonad-metanephron, PDGF: platelet derived growth factor, EGFR: epidermal growth factor receptor, ROBO: roundabout family, BMP: bone morphogenic protein, TGF- $\beta$ : transforming growth factor-beta, VEGF: vascular endothelial growth factor.

**Table S3: Secreted factor mRNAs (n=172) produced by UG26 cells with predicted interactions with the products of genes expressed by activated ESLAM cells.**

| <b>Entrez Gene ID</b> | <b>Gene Symbol</b> | <b>Mean Intensity (Log<sub>2</sub>)</b> | <b>Receptor(s)</b>                                                                                           |
|-----------------------|--------------------|-----------------------------------------|--------------------------------------------------------------------------------------------------------------|
| 16785                 | Rpsa               | 13.23                                   | Atp5b, Csf2ra, Itga6, Kdelr1                                                                                 |
| 16852                 | Lgals1             | 13.20                                   | Cd7, Lgals3bp, Susd2                                                                                         |
| 16952                 | Anxa1              | 12.77                                   | Fpr1, Trpm7                                                                                                  |
| 15481                 | Hspa8              | 12.59                                   | Grb2, Irs1, Cxcr4, Ripk2, Ncor1, Tnfrsf1a, Tnfrsf1b, Cd40, Traf1, Traf2, Atp9b, Ripk3, Kdelr1, Myd88         |
| 16854                 | Lgals3             | 12.42                                   | Lgals3bp, Cubn, Ncoa3                                                                                        |
| 14683                 | Gnas               | 12.32                                   | Grin2b                                                                                                       |
| 23980                 | Pebp1              | 12.29                                   | Adrbk1, Ppard, Nr2c2                                                                                         |
| 17319                 | Mif                | 12.22                                   | Cd74, Tnfrsf14                                                                                               |
| 14456                 | Gas6               | 12.18                                   | Mertk, Tyro3                                                                                                 |
| 12261                 | C1qbp              | 12.14                                   | Gab1, Gabrb1, Tnfrsf1a, Tnfrsf1b, Traf1, Ripk3                                                               |
| 22166                 | Txn1               | 12.12                                   | Nr3c1                                                                                                        |
| 12631                 | Cfl1               | 12.11                                   | Grb2                                                                                                         |
| 15519                 | Hsp90aa1           | 12.03                                   | Alk, Ahr, Aip, Ar, Asgr1, Arntl, Esr1, Nr3c1, Nr3c2, Kdr, Ppara, Tnfrsf1a, Nr2c2, Traf1, Traf2, Ripk3, Ripk2 |
| 227753                | Gsn                | 11.86                                   | Ar, Grb2, Grin2b                                                                                             |
| 12306                 | Anxa2              | 11.85                                   | Grb2                                                                                                         |
| 14219                 | Ctgf               | 11.85                                   | ErbB4, Lrp1, Itga5                                                                                           |
| 14115                 | Fbln2              | 11.77                                   | Itgb3, Nsd1                                                                                                  |
| 18787                 | Serpine1           | 11.74                                   | Lrp2, Lrp1, Thbd, Vtn, Lrp1b                                                                                 |
| 21858                 | Timp2              | 11.70                                   | Itga3, Pgrmc1                                                                                                |
| 18073                 | Nid1               | 11.55                                   | Itgav, Itgb3, Lgals3bp, Ptprf, Notch1                                                                        |
| 12010                 | B2m                | 11.45                                   | Fcgrt, Tfrc                                                                                                  |
| 19156                 | Psap               | 11.37                                   | Celsr1                                                                                                       |
| 21825                 | Thbs1              | 11.01                                   | Cd36, Scarb2, Lrp1, Lrp5, Itgb3, Tnfrsf11b                                                                   |
| 12317                 | Calr               | 10.96                                   | Ar, Nr3c1, Itga2b, Itga3, Itgav, Lrp1                                                                        |
| 12847                 | Copa               | 10.88                                   | Pdgfrb, Mtnr1b                                                                                               |
| 20315                 | Cxcl12             | 10.78                                   | Cxcr4, Cxcr7, Dpp4                                                                                           |
| 12827                 | Col4a2             | 10.78                                   | Cd44, Cd93, Antxr2                                                                                           |
| 21859                 | Timp3              | 10.69                                   | Kdr                                                                                                          |
| 12826                 | Col4a1             | 10.68                                   | Cd44, Cd93                                                                                                   |
| 14828                 | Hspa5              | 10.65                                   | Atp5b, Scarb2, Htr3a, Ldlr, Grb2, Gria1, Tnfrsf1a, Tnfrsf1b, Traf2, Mtnr1b, Ripk3, Myd88                     |
| 12833                 | Col6a1             | 10.61                                   | Cd44, Lgals3bp                                                                                               |
| 20296                 | Ccl2               | 10.52                                   | Ccr2                                                                                                         |
| 12842                 | Colla1             | 10.47                                   | Cd44, Cd36, Itga2, Itga5, Cd93, Ddr2                                                                         |
| 231887                | Pdap1              | 10.39                                   | Pdgfrb                                                                                                       |
| 13024                 | Ctla2a             | 10.29                                   | Tinagl1                                                                                                      |
| 16423                 | Cd47               | 10.29                                   | Itgav, P2ry2                                                                                                 |
| 14751                 | Gpi1               | 10.25                                   | Amfr                                                                                                         |
| 12331                 | Cap1               | 10.18                                   | Traf3                                                                                                        |
| 13722                 | Aimp1              | 10.17                                   | Slc20a1                                                                                                      |

|        |          |       |                                                   |
|--------|----------|-------|---------------------------------------------------|
| 17387  | Mmp14    | 10.13 | Lrp1, Itgav                                       |
| 12832  | Col5a2   | 10.06 | Cd44                                              |
| 14205  | Figf     | 9.97  | Kdr, Flt4, Itga9                                  |
| 13003  | Vcan     | 9.97  | Itga4                                             |
| 21814  | Tgfbr3   | 9.96  | Acvr2a, Tgfbr2, Tgfbr1                            |
| 56348  | Hsd17b12 | 9.93  | Slc7a1                                            |
| 14268  | Fnl      | 9.91  | Cd44                                              |
| 14313  | Fst      | 9.85  | Spsb1                                             |
| 16007  | Cyr61    | 9.74  | Itgav                                             |
| 12977  | Csfl     | 9.67  | Csflr, Celsr3, Slc7a1, Myd88                      |
| 20306  | Ccl7     | 9.63  | Ccr2, Ccr1, Ccr11                                 |
| 226519 | Lamc1    | 9.47  | Cd44, Sv2a, Sv2b, Sv2c                            |
| 14825  | Cxcl1    | 9.31  | Cxcr2                                             |
| 21923  | Tnc      | 9.28  | Itga9, Itga5, Itgb6, Ptprb, Itga8                 |
| 12843  | Col1a2   | 9.26  | Cd44, Cd36, Itga2, Itga2b, Itgb3, Cd93            |
| 57914  | Crlf2    | 9.23  | Il7r                                              |
| 19242  | Ptn      | 9.23  | Alk, Gnb2l1, Ptprb, Ptprz1, Ryr1                  |
| 22341  | Vegfc    | 9.20  | Kdr, Flt4                                         |
| 14423  | Galnt1   | 9.18  | Ptprf                                             |
| 21826  | Thbs2    | 9.13  | Cd36                                              |
| 15530  | Hspg2    | 9.08  | Itga2                                             |
| 16779  | Lamb2    | 9.00  | Cd44, Sv2a, Sv2b, Sv2c                            |
| 20377  | Sfrp1    | 8.92  | Fzd6                                              |
| 12834  | Col6a2   | 8.87  | Cd44                                              |
| 16323  | Inhba    | 8.76  | Acvr2a, Acvr2b, Acvr1, Tgfbr3                     |
| 12830  | Col4a5   | 8.75  | Cd44, Cd93                                        |
| 53381  | Prdx4    | 8.71  | Atp5b                                             |
| 19039  | Lgals3bp | 8.65  | Phb2                                              |
| 54635  | Pdgfc    | 8.63  | Pdgfra                                            |
| 12159  | Bmp4     | 8.59  | Bmpr1a, Bmpr1b, Bmpr2                             |
| 16412  | Itgb1    | 8.56  | Ptch2                                             |
| 76737  | Creld2   | 8.54  | Chrna4, Chrnb2                                    |
| 22340  | Vegfb    | 8.50  | Flt1, Nrp1                                        |
| 110611 | Hdlbp    | 8.49  | Gnb2l1, Ptch2                                     |
| 12831  | Col5a1   | 8.42  | Cd44, Lgals3bp                                    |
| 20348  | Sema3c   | 8.41  | Nrp1                                              |
| 19128  | Prosl    | 8.41  | Tyro3                                             |
| 18590  | Pdgfa    | 8.40  | Pdgfra                                            |
| 16777  | Lamb1    | 8.39  | Cd44, Sv2a, Sv2b, Sv2c                            |
| 14178  | Fgf7     | 8.38  | Fgfr3, Fgfr4, Nrp1                                |
| 13138  | Dag1     | 8.23  | Grb2, Rapsn, Musk                                 |
| 11883  | Arsa     | 8.23  | Bmpr2                                             |
| 12931  | Crlf1    | 8.22  | Cntfr                                             |
| 13874  | Ereg     | 8.19  | ErbB4                                             |
| 14600  | Ghr      | 8.14  | Grb2, Irs1, Ncoa6                                 |
| 18208  | Ntn1     | 8.09  | Adora2b, Dcc, Neol, Unc5c                         |
| 56213  | Htra1    | 7.98  | Grb2                                              |
| 17311  | Kitl     | 7.89  | Kit                                               |
| 21803  | Tgfb1    | 7.85  | Acvr11, Itgav, Itgb6, Tgfbr1, Tgfbr2, Tgfbr3, Vtn |
| 16956  | Lpl      | 7.85  | Lrp2, Lrp1                                        |
| 13614  | Edn1     | 7.85  | Ednra, Ednrb                                      |

|        |         |      |                                                    |
|--------|---------|------|----------------------------------------------------|
| 17295  | Met     | 7.81 | Grb2, Gab1, Ptprb, Ptpnj, Spsb1, Itgb4, Plxnb1     |
| 11535  | Adm     | 7.76 | Calcr1, Gpr182                                     |
| 12837  | Col8a1  | 7.71 | Itga1, Itga2, Efemp2                               |
| 22418  | Wnt5a   | 7.70 | Fzd1, Fzd5, Ror2, Lrp6, Ryk                        |
| 13038  | Ctsk    | 7.70 | Fgfr3                                              |
| 15200  | Hbegf   | 7.63 | ErbB4                                              |
| 17388  | Mmp15   | 7.53 | Lrp1                                               |
| 12064  | Bdnf    | 7.52 | Esrl, Sort1                                        |
| 114249 | Npnt    | 7.49 | Itga8                                              |
| 16835  | Ldlr    | 7.40 | Ldlrap1, Lrpap1, Flt1                              |
| 12825  | Col3a1  | 7.36 | Cd44, Ddr2                                         |
| 433375 | Creg1   | 7.33 | Igf2r                                              |
| 11486  | Ada     | 7.27 | Adora1, Adora2a, Adora2b, Dpp4, Drd1a, Grb2, Nr3c1 |
| 20563  | Slit2   | 7.26 | Robo2                                              |
| 16880  | Lifr    | 7.23 | Cntfr, Il31ra                                      |
| 12822  | Col18a1 | 7.23 | Kdr, Itga5                                         |
| 20564  | Slit3   | 7.17 | Robo2                                              |
| 30878  | Apln    | 7.14 | Aplnr                                              |
| 15925  | Ide     | 7.13 | Ar, Nr3c1                                          |
| 100952 | Emilin1 | 7.11 | Tgfbr2                                             |
| 16194  | Il6ra   | 7.00 | Erap1                                              |
| 16403  | Itga6   | 6.99 | Cd36, Grb2, Itgb4                                  |
| 19206  | Ptch1   | 6.97 | Smo                                                |
| 11826  | Aqp1    | 6.94 | Trip6, Efemp2                                      |
| 67573  | Loxl4   | 6.89 | Trip13                                             |
| 21827  | Thbs3   | 6.88 | Cd36                                               |
| 12475  | Cd14    | 6.87 | Tlr3, Itgb2, Lgals3bp, Tlr4, Tlr2, Itgam           |
| 20210  | Saa3    | 6.71 | Fpr1                                               |
| 20350  | Sema3f  | 6.68 | Nrp1                                               |
| 11491  | Adam17  | 6.66 | ErbB4, Notch1, Ptpn3                               |
| 94216  | Col4a6  | 6.65 | Cd44, Cd93                                         |
| 16190  | Il4ra   | 6.64 | Gnb2l1, Il13ra1, Irs1, Irs2, Cd40                  |
| 18049  | Ngf     | 6.62 | Sort1, Ngfr, Ntrk1                                 |
| 20300  | Ccl25   | 6.59 | Ccr9, Ccr10, Ccbp2                                 |
| 22417  | Wnt4    | 6.57 | Fzd6                                               |
| 56708  | Clefl   | 6.54 | Cntfr, Crlf1                                       |
| 21808  | Tgfb2   | 6.48 | Tgfbr1, Tgfbr2, Tgfbr3, Vtn                        |
| 21802  | Tgfa    | 6.37 | ErbB4, Rhbdf1                                      |
| 12835  | Col6a3  | 6.30 | Cd44                                               |
| 20312  | Cx3cl1  | 6.28 | Cx3cr1                                             |
| 14172  | Fgf18   | 6.23 | Fgfr3, Fgfr4                                       |
| 20349  | Sema3e  | 6.21 | Plxnd1                                             |
| 13848  | Ephb6   | 6.19 | Grb2, Ephb1                                        |
| 22339  | Vegfa   | 6.14 | Flt1, Kdr, Grin2b                                  |
| 16173  | Il18    | 6.14 | Il1rl2, Il18rap, Il18r1                            |
| 16819  | Lcn2    | 6.11 | Lrp2                                               |
| 53623  | Gria3   | 6.10 | Gria2                                              |
| 22403  | Wisp2   | 6.07 | Igf1r, Igf2r                                       |
| 22413  | Wnt2    | 6.04 | Fzd1, Fzd9                                         |
| 17087  | Ly96    | 6.02 | Tlr4, Tlr2                                         |
| 20310  | Cxcl2   | 5.95 | Cxcr2                                              |

|        |         |      |                                                                |
|--------|---------|------|----------------------------------------------------------------|
| 20440  | St6gal1 | 5.94 | Cd22                                                           |
| 21809  | Tgfb3   | 5.89 | Acvr11, Tgfbr1, Tgfbr2, Tgfbr3                                 |
| 18133  | Nov     | 5.84 | Notch1                                                         |
| 22042  | Tfre    | 5.79 | Gabarap                                                        |
| 16975  | Lrp8    | 5.75 | Grin1                                                          |
| 20660  | Sor11   | 5.67 | Lrpap1                                                         |
| 11815  | Apod    | 5.63 | Lepr, Atp5b, Scarb2                                            |
| 14566  | Gdf9    | 5.40 | Acvr2a, Bmpr1a, Bmpr1b, Bmpr2                                  |
| 21950  | Tnfrsf9 | 5.24 | Tnfrsf9, Traf1, Traf2                                          |
| 13214  | Defb1   | 5.23 | Ccr6                                                           |
| 19143  | St14    | 5.19 | F2rl1                                                          |
| 16193  | Il6     | 5.14 | Il6ra, Hrh1                                                    |
| 17082  | Il1rl1  | 5.13 | Myd88                                                          |
| 13636  | Efna1   | 5.10 | Epha1, Epha2, Epha3, Epha4, Epha6, Epha7, Epha8, Ephb1, Tgfbr1 |
| 53867  | Col5a3  | 4.91 | Cd44                                                           |
| 16180  | Il1rap  | 4.88 | Irak1, Il1r1                                                   |
| 16878  | Lif     | 4.85 | Lifr                                                           |
| 20750  | Spp1    | 4.68 | Itga9, Itga5, Itgav                                            |
| 16196  | Il7     | 4.60 | Il7r                                                           |
| 18591  | Pdgfb   | 4.31 | Pdgfra, Pdgfrb                                                 |
| 16169  | Il15ra  | 4.30 | Traf2, Il2rb                                                   |
| 16000  | Igf1    | 4.26 | Igf1r, Igsf1                                                   |
| 53603  | Tslp    | 4.05 | Il7r, Crf2                                                     |
| 11600  | Angpt1  | 3.90 | Itga5, Tek                                                     |
| 12223  | Btc     | 3.90 | ErbB4, Egfr                                                    |
| 11602  | Angpt4  | 3.76 | Tek                                                            |
| 71785  | Pdgfd   | 3.38 | Pdgfrb                                                         |
| 53604  | Zbp1    | 3.34 | Zp2                                                            |
| 110312 | Pmch    | 3.24 | Mchr1                                                          |
| 12156  | Bmp2    | 3.22 | Acvr1, Bmpr1b, Bmpr2, Bmpr1a                                   |
| 13645  | Egf     | 3.19 | Egfr, ErbB3, Grb2, Vtn                                         |

## References:

Benveniste, P., Frelin, C., Janmohamed, S., Barbara, M., Herrington, R., Hyam, D., and Iscove, N.N. (2010). Intermediate-term hematopoietic stem cells with extended but time-limited reconstitution potential. *Cell Stem Cell* 6, 48-58.

Challen, G.A., Boles, N.C., Chambers, S.M., and Goodell, M.A. Distinct hematopoietic stem cell subtypes are differentially regulated by TGF-beta1. *Cell Stem Cell* 6, 265-278.

Croft, D., O'Kelly, G., Wu, G., Haw, R., Gillespie, M., Matthews, L., Caudy, M., Garapati, P., Gopinath, G., Jassal, B., *et al.* Reactome: a database of reactions, pathways and biological processes. *Nucleic Acids Res* 39, D691-697.

Durand, C., Robin, C., Bollerot, K., Baron, M.H., Ottersbach, K., and Dzierzak, E. (2007). Embryonic stromal clones reveal developmental regulators of definitive hematopoietic stem cells. *Proc Natl Acad Sci U S A* 104, 20838-20843.

- Dykstra, B., Kent, D., Bowie, M., McCaffrey, L., Hamilton, M., Lyons, K., Lee, S.J., Brinkman, R., and Eaves, C. (2007). Long-term propagation of distinct hematopoietic differentiation programs in vivo. *Cell Stem Cell* 1, 218-229.
- Gentleman, R.C., Carey, V.J., Bates, D.M., Bolstad, B., Dettling, M., Dudoit, S., Ellis, B., Gautier, L., Ge, Y., Gentry, J., *et al.* (2004). Bioconductor: open software development for computational biology and bioinformatics. *Genome Biol* 5, R80.
- Gerber, H.P., Malik, A.K., Solar, G.P., Sherman, D., Liang, X.H., Meng, G., Hong, K., Marsters, J.C., and Ferrara, N. (2002). VEGF regulates haematopoietic stem cell survival by an internal autocrine loop mechanism. *Nature* 417, 954-958.
- Kent, D., Dykstra, B., and Eaves, C. (2007). Isolation and assessment of long-term reconstituting hematopoietic stem cells from adult mouse bone marrow. *Curr Protoc Stem Cell Biol Chapter 2, Unit 2A 4.*
- Kumano, K., Chiba, S., Kunisato, A., Sata, M., Saito, T., Nakagami-Yamaguchi, E., Yamaguchi, T., Masuda, S., Shimizu, K., Takahashi, T., *et al.* (2003). Notch1 but not Notch2 is essential for generating hematopoietic stem cells from endothelial cells. *Immunity* 18, 699-711.
- Notta, F., Doulatov, S., Laurenti, E., Poepl, A., Jurisica, I., and Dick, J.E. Isolation of single human hematopoietic stem cells capable of long-term multilineage engraftment. *Science* 333, 218-221.
- Reya, T., Duncan, A.W., Ailles, L., Domen, J., Scherer, D.C., Willert, K., Hintz, L., Nusse, R., and Weissman, I.L. (2003). A role for Wnt signalling in self-renewal of haematopoietic stem cells. *Nature* 423, 409-414.
- Ryan, M.A., Nattamai, K.J., Xing, E., Schleimer, D., Daria, D., Sengupta, A., Kohler, A., Liu, W., Gunzer, M., Jansen, M., *et al.* Pharmacological inhibition of EGFR signaling enhances G-CSF-induced hematopoietic stem cell mobilization. *Nat Med* 16, 1141-1146.
- Shibata, F., Goto-Koshino, Y., Morikawa, Y., Komori, T., Ito, M., Fukuchi, Y., Houchins, J.P., Tsang, M., Li, D.Y., Kitamura, T., *et al.* (2009). Roundabout 4 is expressed on hematopoietic stem cells and potentially involved in the niche-mediated regulation of the side population phenotype. *Stem Cells* 27, 183-190.
- Smith-Berdan, S., Nguyen, A., Hassanein, D., Zimmer, M., Ugarte, F., Ciriza, J., Li, D., Garcia-Ojeda, M.E., Hinck, L., and Forsberg, E.C. Robo4 cooperates with CXCR4 to specify hematopoietic stem cell localization to bone marrow niches. *Cell Stem Cell* 8, 72-83.
- Smyth, G.K., Michaud, J., and Scott, H.S. (2005). Use of within-array replicate spots for assessing differential expression in microarray experiments. *Bioinformatics* 21, 2067-2075.



Stark, C., Breitkreutz, B.J., Reguly, T., Boucher, L., Breitkreutz, A., and Tyers, M. (2006). BioGRID: a general repository for interaction datasets. *Nucleic acids research* 34, D535-539.

Su, R.J., Zhang, X.B., Li, K., Yang, M., Li, C.K., Fok, T.F., James, A.E., Pong, H., and Yuen, P.M. (2002). Platelet-derived growth factor promotes ex vivo expansion of CD34+ cells from human cord blood and enhances long-term culture-initiating cells, non-obese diabetic/severe combined immunodeficient repopulating cells and formation of adherent cells. *Br J Haematol* 117, 735-746.

Subramanian, A., Tamayo, P., Mootha, V.K., Mukherjee, S., Ebert, B.L., Gillette, M.A., Paulovich, A., Pomeroy, S.L., Golub, T.R., Lander, E.S., *et al.* (2005). Gene set enrichment analysis: a knowledge-based approach for interpreting genome-wide expression profiles. *Proc Natl Acad Sci U S A* 102, 15545-15550.

Willert, K., Brown, J.D., Danenberg, E., Duncan, A.W., Weissman, I.L., Reya, T., Yates, J.R., 3rd, and Nusse, R. (2003). Wnt proteins are lipid-modified and can act as stem cell growth factors. *Nature* 423, 448-452.

Yellaboina, S., Dudekula, D.B., and Ko, M. (2008). Prediction of evolutionarily conserved interologs in *Mus musculus*. *BMC genomics* 9, 465.
